# Supplementary material
Source: PubMed Central journal article supplement (PMC5074537)
Supplement: NIHMS769727-supplement-Supp_Table_1.pdf [file NIHMS769727-supplement-Supp_Table_1.pdf]

Supplementary Table S1 | **Effectors of the *Salmonella* spp. T3SSs.**

\* limited data on biological significance.

\*\* not all may be physiologically relevant. Please refer to references cited.

| SPI-1           |                                   |                                             |                                |                                                                                                                                                                                                                                                                                                                                                      |                   |
|-----------------|-----------------------------------|---------------------------------------------|--------------------------------|------------------------------------------------------------------------------------------------------------------------------------------------------------------------------------------------------------------------------------------------------------------------------------------------------------------------------------------------------|-------------------|
| <i>Effector</i> | <i>Biochemical activity</i>       | <i>Host post-translational modification</i> | <i>Host binding partners**</i> | <i>Host subcellular localization and effects</i>                                                                                                                                                                                                                                                                                                     | <i>References</i> |
| AvrA            | Acetyltransferase                 | Phosphorylation                             | MAP kinase kinases, p53        | Inhibits NF-κB signalling and IL-8 production; acetylates p53                                                                                                                                                                                                                                                                                        | 1-4               |
| GtgE            | Cysteine protease                 | Unknown                                     | Rab29, Rab32, Rab38            | Cleaves Rab29, Rab32 and Rab38 at regulatory switch regions to prevent their localization to the SCV                                                                                                                                                                                                                                                 | 5, 6              |
| SipA (SspA)     | Stabilizes F-actin                | Cleavage by caspase-3                       | F-actin, T-plastin; PERP       | Inhibits depolymerization and increases actin bundling to facilitate invasion; Decreases the critical concentration of G-actin and increases the stability of F-actin, remains localized on the SCV, contributes to intestinal inflammation, promotes PMN migration across the intestinal epithelium; protects F-actin from villin-directed severing | 7-12              |
| SipB (SspB)     | Translocon                        | Unknown                                     | Unknown                        | Translocon, can activate caspase-1 and promote IL-1β and IL-18 release from macrophages*                                                                                                                                                                                                                                                             | 13-16             |
| SipC (SspC)     | Translocon                        | Unknown                                     | Actin, syntaxin6, vimentin     | Translocon, can bundle and nucleate actin on insertion; can bind to intermediate filaments, contributes to intestinal inflammation                                                                                                                                                                                                                   | 16-21             |
| SopA            | HECT E3 ubiquitin ligase          | Ubiquitylation<br>Cleavage by caspase-3     | Unknown                        | Contributes to intestinal inflammation                                                                                                                                                                                                                                                                                                               | 10, 22-24         |
| SopB (SigD)     | GDI; phosphoinositide phosphatase | Ubiquitylation                              | Cdc42, inositol phosphates     | Modulates actin by altering inositol phosphate levels; alters surface charge on the SCV. Implicated in membrane ruffling, initiation of M-cell development, and inhibition of SCV-lysosome fusion during infection, contributes to intestinal inflammation                                                                                           | 25-31             |
| SopD            | Unknown                           | Unknown                                     | Unknown                        | Activates fluid secretion in bovine ligated ileal loops and contributes to diarrhoea in calves and systemic disease in mice                                                                                                                                                                                                                          | 32                |
| SopE            | GEF                               | Inactivated by proteasomal degradation      | Rac1, Cdc42                    | With host factors regulates actin polymerization to promote invasion; activates caspase-1 to elicit gut inflammation                                                                                                                                                                                                                                 | 27, 33-36         |
| SopE2           | GEF                               | Unknown                                     | Rac1, Cdc42                    | Activates Cdc42 and Rac1 to regulate actin; disrupts tight junctions; stimulates innate immune response in epithelial cells, contributes to intestinal inflammation                                                                                                                                                                                  | 27, 30, 37, 38    |

|                        |                             |                                             |                                 |                                                                                                                                                                                                                                                                                                                                                      |                   |
|------------------------|-----------------------------|---------------------------------------------|---------------------------------|------------------------------------------------------------------------------------------------------------------------------------------------------------------------------------------------------------------------------------------------------------------------------------------------------------------------------------------------------|-------------------|
| SptP                   | GAP; tyrosine phosphatase   | Ubiquitylation                              | Rac1, Cdc42, VCP                | Inhibits Cdc42 and Rac1 to restore epithelial cell morphology after invasion; inhibits IL-8 production by epithelial cells; inhibits MAPK pathway by inhibiting Raf; dephosphorylates VCP to promote intracellular replication and ET formation; inhibits villin phosphorylation early in infection                                                  | 11, 39-44         |
| <b>SPI-1 and SPI-2</b> |                             |                                             |                                 |                                                                                                                                                                                                                                                                                                                                                      |                   |
| <b>Effector</b>        | <b>Biochemical activity</b> | <b>Host post-translational modification</b> | <b>Host binding partners**</b>  | <b>Host subcellular localization and effects</b>                                                                                                                                                                                                                                                                                                     | <b>References</b> |
| SlrP                   | E3 ubiquitin ligase         | Unknown                                     | Unknown                         | Reduces redox-related signalling activity and triggers cell death; inhibits dendritic cell migration; inhibits antigen presentation                                                                                                                                                                                                                  | 45-48             |
| SspH1                  | E3 ubiquitin ligase         | Unknown                                     | PKN1                            | Inhibits NF- $\kappa$ B dependent gene expression and IL-8 secretion, nuclear localization                                                                                                                                                                                                                                                           | 40, 49            |
| SteA                   | Unknown                     | Unknown                                     | Unknown                         | Localizes to the Golgi network, unknown function                                                                                                                                                                                                                                                                                                     | 50                |
| SteB                   | Unknown                     | Unknown                                     | Unknown                         | Unknown function                                                                                                                                                                                                                                                                                                                                     | 50                |
| <b>SPI-2</b>           |                             |                                             |                                 |                                                                                                                                                                                                                                                                                                                                                      |                   |
| <b>Effector</b>        | <b>Biochemical activity</b> | <b>Host post-translational modification</b> | <b>Host binding partners**</b>  | <b>Host subcellular localization and effects</b>                                                                                                                                                                                                                                                                                                     | <b>References</b> |
| GogB                   | Unknown                     | Unknown                                     | Unknown                         | Unknown function                                                                                                                                                                                                                                                                                                                                     | 51                |
| PipB                   | Unknown                     | Unknown                                     | Unknown                         | Unknown function                                                                                                                                                                                                                                                                                                                                     | 52                |
| PipB2                  | Unknown                     | Unknown                                     | Kinesin-1                       | Recruits kinesin to SCV; important for peripheral movement of SCV; inhibits dendritic cell migration; inhibits antigen presentation                                                                                                                                                                                                                  | 47, 48, 53-55     |
| SifA                   | Unknown                     | Prenylated; S-acylated                      | SKIP, RhoA, Rab7, Rab9, PLEKHM1 | Links SKIP and kinesin to the SCV and microtubule network to promote endosomal tubulation; role in fission of LAMP-1-positive vesicles from the SCV; inhibits dendritic cell migration; inhibits antigen presentation; interaction with PLEKHM1 promotes recruitment of the Rab7-HOPS complex to mediate phagolysosomal membrane delivery to the SCV | 47, 48, 56-68     |
| SifB                   | Unknown                     | Unknown                                     | Unknown                         | Unknown function                                                                                                                                                                                                                                                                                                                                     | 69                |
| SopD2                  | Unknown                     | Unknown                                     | Unknown                         | Contributes to ET formation; inhibits antigen presentation                                                                                                                                                                                                                                                                                           | 32, 48, 70        |
| SpvB                   | ADP-ribosyltransferase      | Unknown                                     | Actin                           | Limits actin polymerization around the vacuole                                                                                                                                                                                                                                                                                                       | 71-74             |
| SpvC                   | Phosphothreonine lyase      | Unknown                                     | pErk                            | Inhibits MAP kinase-mediated inflammatory responses                                                                                                                                                                                                                                                                                                  | 75, 76            |
| SrgE                   | Unknown                     | Unknown                                     | Unknown                         | Unknown function                                                                                                                                                                                                                                                                                                                                     | 77                |
| SseF                   | Unknown                     | Unknown                                     | Unknown                         | Important for microtubule bundling and perinuclear positioning of the SCV; inhibits dendritic cell migration                                                                                                                                                                                                                                         | 47, 78-80         |
| SseG                   | Unknown                     | Unknown                                     | Unknown                         | Important for microtubule bundling and perinuclear positioning of the SCV                                                                                                                                                                                                                                                                            | 78-80             |
| SseI                   | Unknown                     | S-palmitoylated                             | IQGAP1, TRIP6, Filamin*         | Inhibits macrophage and dendritic cell migration                                                                                                                                                                                                                                                                                                     | 47, 73, 81, 82    |

|       |                                                  |                 |                                  |                                                                                                                                                                          |                   |
|-------|--------------------------------------------------|-----------------|----------------------------------|--------------------------------------------------------------------------------------------------------------------------------------------------------------------------|-------------------|
| SseJ  | Glycerophospholipid: cholesterol acyltransferase | Unknown         | Cholesterol, phospholipids, RhoA | Esterifies cholesterol on the SCV                                                                                                                                        | 57, 63, 83-86     |
| SseK1 | Unknown                                          | Unknown         | Unknown                          | Unknown function                                                                                                                                                         | 87                |
| SseK2 | Unknown                                          | Unknown         | Unknown                          | Unknown function                                                                                                                                                         | 87                |
| SseL  | Deubiquitinase                                   | Unknown         | Unknown                          | Prevents accumulation of lipid droplets                                                                                                                                  | 88, 89            |
| SspH2 | E3 ubiquitin ligase                              | S-palmitoylated | Profilin, Filamin, SGT1          | Localizes to apical surface; enhances Nod1-mediated IL-8 secretion; slows rate of actin polymerization; inhibits antigen presentation; inhibits dendritic cell migration | 47, 48, 73, 90-93 |
| SteC  | Kinase                                           | Unknown         | MAPK, MEK                        | Regulates host cytoskeleton; forms mesh network of F-actin; restricts intracellular replication                                                                          | 50, 94, 95        |

1. Wu, S. et al. Salmonella typhimurium infection increases p53 acetylation in intestinal epithelial cells. *American Journal of Physiology-Gastrointestinal and Liver Physiology* **298**, G784 (2010).
2. Du, F. & Galán, J.E. Selective Inhibition of Type III Secretion Activated Signaling by the *Salmonella* Effector AvrA. *PLoS Pathog* **5**, e1000595 (2009).
3. Collier-Hyams, L.S. et al. Cutting Edge: Salmonella AvrA Effector Inhibits the Key Proinflammatory, Anti-Apoptotic NF- $\kappa$ B Pathway. *The Journal of Immunology* **169**, 2846-2850 (2002).
4. Jones, R.M. et al. Salmonella AvrA Coordinates Suppression of Host Immune and Apoptotic Defenses via JNK Pathway Blockade. *Cell Host & Microbe* **3**, 233-244 (2008).
5. Spano, S., Liu, X. & Galan, J.E. Proteolytic targeting of Rab29 by an effector protein distinguishes the intracellular compartments of human-adapted and broad-host Salmonella. *Proceedings of the National Academy of Sciences* **108**, 18418-18423 (2011).
6. Spano, S. & Galan, J.E. A Rab32-Dependent Pathway Contributes to Salmonella Typhi Host Restriction. *Science* **338**, 960-963 (2012).
7. Zhou, D., Mooseker, M.S. & Galán, J.E. Role of the *S. typhimurium* actin-binding protein SipA in bacterial internalization. *Science* **283**, 2092-2095 (1999).
8. Zhou, D., Mooseker, M.S. & Galán, J.E. An invasion-associated Salmonella protein modulates the actin-bundling activity of plastin. *Proceedings of the National Academy of Sciences* **96**, 10176-10181 (1999).
9. Brawn, L.C., Hayward, R.D. & Koronakis, V. Salmonella SPI1 Effector SipA Persists after Entry and Cooperates with a SPI2 Effector to Regulate Phagosome Maturation and Intracellular Replication. *Cell Host & Microbe* **1**, 63-75 (2007).
10. Srikanth, C.V. et al. Salmonella Pathogenesis and Processing of Secreted Effectors by Caspase-3. *Science* **330**, 390-393 (2010).
11. Lhocine, N. et al. Apical Invasion of Intestinal Epithelial Cells by Salmonella typhimurium Requires Villin to Remodel the Brush Border Actin Cytoskeleton. *Cell Host & Microbe* **11**, 164-77 (2015).

12. Hallstrom, K.N. et al. PERP, a host tetraspanning membrane protein, is required for Salmonella - induced inflammation. *Cellular microbiology* (2015).
13. Hayward, R.D. et al. Cholesterol binding by the bacterial type III translocon is essential for virulence effector delivery into mammalian cells. *Molecular Microbiology* **56**, 590-603 (2005).
14. Hersh, D. et al. The Salmonella invasin SipB induces macrophage apoptosis by binding to caspase-1. *Proceedings of the National Academy of Sciences* **96**, 2396-2401 (1999).
15. Hernandez, L.D., Pypaert, M., Flavell, R.A. & Galán, J.E. A Salmonella protein causes macrophage cell death by inducing autophagy. *The Journal of Cell Biology* **163**, 1123-1131 (2003).
16. Lara-Tejero, M. & Galán, J.E. Salmonella enterica Serovar Typhimurium Pathogenicity Island 1-Encoded Type III Secretion System Translocases Mediate Intimate Attachment to Nonphagocytic Cells. *Infection and Immunity* **77**, 2635-2642 (2009).
17. Hayward, R.D. & Koronakis, V. Direct nucleation and bundling of actin by the SipC protein of invasive Salmonella. *EMBO J* **18**, 4926-4934 (1999).
18. Myeni, S.K. & Zhou, D. The C Terminus of SipC Binds and Bundles F-actin to Promote Salmonella Invasion. *Journal of Biological Chemistry* **285**, 13357-13363 (2010).
19. Madan, R., Rastogi, R., Parashuraman, S. & Mukhopadhyay, A. Salmonella Acquires Lysosome-associated Membrane Protein 1 (LAMP1) on Phagosomes from Golgi via SipC Protein-mediated Recruitment of Host Syntaxin6. *Journal of Biological Chemistry* **287**, 5574-5587 (2012).
20. Scherer, C.A., Cooper, E. & Miller, S.I. The Salmonella type III secretion translocon protein SspC is inserted into the epithelial cell plasma membrane upon infection. *Molecular Microbiology* **37**, 1133-1145 (2000).
21. Carlson, S.A., Omary, M.B. & Jones, B.D. Identification of cytokeratins as accessory mediators of Salmonella entry into eukaryotic cells. *Life Sciences* **70**, 1415-1426 (2002).
22. Zhang, Y., Higashide, W.M., McCormick, B.A., Chen, J. & Zhou, D. The inflammation-associated Salmonella SopA is a HECT-like E3 ubiquitin ligase. *Molecular Microbiology* **62**, 786-793 (2006).
23. Diao, J., Zhang, Y., Huibregtse, J.M., Zhou, D. & Chen, J. Crystal structure of SopA, a Salmonella effector protein mimicking a eukaryotic ubiquitin ligase. *Nature structural & molecular biology* **15**, 65-70 (2008).
24. Zhang, Y., Higashide, W., Dai, S., Sherman, D.M. & Zhou, D. Recognition and ubiquitination of Salmonella type III effector SopA by a ubiquitin E3 ligase, HsRMA1. *Journal of Biological Chemistry* **280**, 38682-38688 (2005).
25. Burkinshaw, B.J., Prehna, G., Worrall, L.J. & Strynadka, N.C.J. Structure of Salmonella Effector Protein SopB N-terminal Domain in Complex with Host Rho GTPase Cdc42. *Journal of Biological Chemistry* **287**, 13348-13355 (2012).
26. Bakowski, M.A. et al. The Phosphoinositide Phosphatase SopB Manipulates Membrane Surface Charge and Trafficking of the Salmonella-Containing Vacuole. *Cell Host & Microbe* **7**, 453-462 (2010).
27. Boyle, E.C., Brown, N.F. & Finlay, B.B. Salmonella enterica serovar Typhimurium effectors SopB, SopE, SopE2 and SipA disrupt tight junction structure and function. *Cellular Microbiology* **8**, 1946-1957 (2006).
28. Terebiznik, M.R. et al. Elimination of host cell PtdIns(4,5)P2 by bacterial SigD promotes membrane fission during invasion by Salmonella. *Nat Cell Biol* **4**, 766-773 (2002).

29. Raffatellu, M. et al. SipA, SopA, SopB, SopD, and SopE2 contribute to *Salmonella enterica* serotype typhimurium invasion of epithelial cells. *Infection and Immunity* **73**, 146-154 (2005).
30. Bruno, V.M. et al. *Salmonella* Typhimurium Type III Secretion Effectors Stimulate Innate Immune Responses in Cultured Epithelial Cells. *PLoS Pathog* **5**, e1000538 (2009).
31. Knodler, L.A., Winfree, S., Drecktrah, D., Ireland, R. & Steele-Mortimer, O. Ubiquitination of the bacterial inositol phosphatase, SopB, regulates its biological activity at the plasma membrane. *Cellular Microbiology* **11**, 1652-1670 (2009).
32. Jiang, X. et al. The related effector proteins SopD and SopD2 from *Salmonella enterica* serovar Typhimurium contribute to virulence during systemic infection of mice. *Molecular Microbiology* **54**, 1186-1198 (2004).
33. Hardt, W.D., Chen, L.M., Schuebel, K.E., Bustelo, X.R. & Galán, J.E. *S. typhimurium* encodes an activator of Rho GTPases that induces membrane ruffling and nuclear responses in host cells. *Cell* **93**, 815-826 (1998).
34. Muller, A.J. et al. The *S. Typhimurium* Effector SopE Induces Caspase-1 Activation in Stromal Cells to Initiate Gut Inflammation. *Cell Host & Microbe* **6**, 125-136 (2009).
35. Lopez, C.A. et al. Phage-Mediated Acquisition of a Type III Secreted Effector Protein Boosts Growth of *Salmonella* by Nitrate Respiration. *mBio* **3** (2012).
36. Humphreys, D., Davidson, A., Hume, P.J. & Koronakis, V. *Salmonella* Virulence Effector SopE and Host GEF ARNO Cooperate to Recruit and Activate WAVE to Trigger Bacterial Invasion. *Cell Host & Microbe* **11**, 129-139 (2012).
37. Friebel, A. et al. SopE and SopE2 from *Salmonella typhimurium* Activate Different Sets of RhoGTPases of the Host Cell. *Journal of Biological Chemistry* **276**, 34035-34040 (2001).
38. Stender, S. et al. Identification of SopE2 from *Salmonella typhimurium*, a conserved guanine nucleotide exchange factor for Cdc42 of the host cell. *Molecular Microbiology* **36**, 1206-1221 (2000).
39. Fu, Y. & Galán, J.E. A *Salmonella* protein antagonizes Rac-1 and Cdc42 to mediate host-cell recovery after bacterial invasion. *Nature* **401**, 293-297 (1999).
40. Haraga, A. & Miller, S.I. A *Salmonella enterica* Serovar Typhimurium Translocated Leucine-Rich Repeat Effector Protein Inhibits NF-KB-Dependent Gene Expression. *Infection and Immunity* **71**, 4052-4058 (2003).
41. Lin, S.L., Le, T.X. & Cowen, D.S. SptP, a *Salmonella typhimurium* type III-secreted protein, inhibits the mitogen-activated protein kinase pathway by inhibiting Raf activation. *Cellular Microbiology* **5**, 267-275 (2003).
42. Humphreys, D., Hume, P.J. & Koronakis, V. The *Salmonella* Effector SptP Dephosphorylates Host AAA+ ATPase VCP to Promote Development of its Intracellular Replicative Niche. *Cell Host & Microbe* **5**, 225-233 (2009).
43. Murli, S., Watson, R.O. & Galán, J.E. Role of tyrosine kinases and the tyrosine phosphatase SptP in the interaction of *Salmonella* with host cells. *Cellular Microbiology* **3**, 795-810 (2001).
44. Kubori, T. & Galán, J.E. Temporal Regulation of *Salmonella* Virulence Effector Function by Proteasome-Dependent Protein Degradation. *Cell* **115**, 333-342 (2003).
45. Bernal-Bayard, J. & Ramos-Morales, F. *Salmonella* Type III Secretion Effector SirP Is an E3 Ubiquitin Ligase for Mammalian Thioredoxin. *Journal of Biological Chemistry* **284**, 27587-27595 (2009).
46. Bernal-Bayard, J., Cardenal-Munoz, E. & Ramos-Morales, F. The *Salmonella* Type III Secretion Effector, *Salmonella* Leucine-rich Repeat Protein (SirP), Targets the Human Chaperone ERdj3. *Journal of Biological Chemistry* **285**, 16360-16368 (2010).

47. McLaughlin, L.M. et al. A microfluidic-based genetic screen to identify microbial virulence factors that inhibit dendritic cell migration. *Integrative Biology* **6**, 438-449 (2014).
48. Halici, S., Zenk, S.F., Jantsch, J. & Hensel, M. Functional Analysis of the Salmonella Pathogenicity Island 2-Mediated Inhibition of Antigen Presentation in Dendritic Cells. *Infection and Immunity* **76**, 4924-4933 (2008).
49. Haraga, A. & Miller, S.I. A Salmonella type III secretion effector interacts with the mammalian serine/threonine protein kinase PKN1. *Cellular Microbiology* **8**, 837-846 (2006).
50. Geddes, K., Worley, M., Niemann, G. & Heffron, F. Identification of New Secreted Effectors in Salmonella enterica Serovar Typhimurium. *Infection and Immunity* **73**, 6260-6271 (2005).
51. Pilar, A.V., Reid-Yu, S.A., Cooper, C.A., Mulder, D.T. & Coombes, B.K. GogB is an anti-inflammatory effector that limits tissue damage during Salmonella infection through interaction with human FBXO22 and Skp1. *PLoS Pathog* **8**, e1002773 (2012).
52. Knodler, L. et al. Salmonella type III effectors PipB and PipB2 are targeted to detergent-resistant microdomains on internal host cell membranes. *Molecular Microbiology* **49**, 685-704 (2003).
53. Szeto, J., Namolovan, A., Osborne, S.E., Coombes, B.K. & Brumell, J.H. Salmonella-Containing Vacuoles Display Centrifugal Movement Associated with Cell-to-Cell Transfer in Epithelial Cells. *Infection and Immunity* **77**, 996-1007 (2009).
54. Henry, T. et al. The Salmonella effector protein PipB2 is a linker for kinesin-1. *Proceedings of the National Academy of Sciences* **103**, 13497-13502 (2006).
55. Knodler, L.A. & Steele-Mortimer, O. The Salmonella Effector PipB2 Affects Late Endosome/Lysosome Distribution to Mediate Sif Extension. *Molecular Biology of the Cell* **16**, 4108-4123 (2005).
56. Beuzón, C.R. et al. Salmonella maintains the integrity of its intracellular vacuole through the action of SifA. *EMBO J* **19**, 3235-3249 (2000).
57. Ruíz-Albert, J. et al. Complementary activities of SseJ and SifA regulate dynamics of the Salmonella typhimurium vacuolar membrane. *Molecular Microbiology* **44**, 645-661 (2002).
58. Brumell, J., Goosney, D. & Finlay, B. SifA, a Type III Secreted Effector of Salmonella typhimurium, Directs Salmonella-Induced Filament (Sif) Formation Along Microtubules. *Traffic* **3**, 407-415 (2002).
59. Harrison, R.E. et al. Salmonella Impairs RILP Recruitment to Rab7 during Maturation of Invasion Vacuoles. *Molecular Biology of the Cell* **15**, 3146-3154 (2004).
60. Boucrot, E., Henry, T., Borg, J.-P., Gorvel, J.-P. & Méresse, S. The Intracellular Fate of Salmonella Depends on the Recruitment of Kinesin. *Science* **308**, 1174-1178 (2005).
61. Diacovich, L. et al. Interaction between the SifA Virulence Factor and Its Host Target SKIP Is Essential for Salmonella Pathogenesis. *Journal of Biological Chemistry* **284**, 33151-33160 (2009).
62. Dumont, A. et al. SKIP, the Host Target of the Salmonella Virulence Factor SifA, Promotes Kinesin-1-Dependent Vacuolar Membrane Exchanges. *Traffic* **11**, 899-911 (2010).
63. Ohlson, M.B. et al. Structure and Function of Salmonella SifA Indicate that Its Interactions with SKIP, SseJ, and RhoA Family GTPases Induce Endosomal Tubulation. *Cell Host & Microbe* **4**, 434-446 (2008).
64. Arbeloa, A. et al. EspM2 is a RhoA guanine nucleotide exchange factor. *Cellular Microbiology* **12**, 654-664 (2010).

65. McGourty, K. et al. Salmonella Inhibits Retrograde Trafficking of Mannose-6-Phosphate Receptors and Lysosome Function. *Science* **338**, 963-967 (2012).
66. Boucrot, E., Beuzón, C.R., Holden, D.W., Gorvel, J.-P. & Méresse, S. Salmonella typhimurium SifA Effector Protein Requires Its Membrane-anchoring C-terminal Hexapeptide for Its Biological Function. *Journal of Biological Chemistry* **278**, 14196-14202 (2003).
67. Reinicke, A.T. et al. A Salmonella typhimurium Effector Protein SifA Is Modified by Host Cell Prenylation and S-Acylation Machinery. *Journal of Biological Chemistry* **280**, 14620-14627 (2005).
68. McEwan, David G. et al. PLEKHM1 Regulates Salmonella-Containing Vacuole Biogenesis and Infection. *Cell Host & Microbe* **17**, 58-71 (2015).
69. Freeman, J.A., Ohi, M.E. & Miller, S.I. The *Salmonella enterica* Serovar Typhimurium Translocated Effectors SseJ and SifB Are Targeted to the Salmonella-Containing Vacuole. *Infection and Immunity* **71**, 418-427 (2003).
70. Schroeder, N. et al. The Virulence Protein SopD2 Regulates Membrane Dynamics of *Salmonella* Containing Vacuoles. *PLoS Pathog* **6**, e1001002 (2010).
71. Tezcan-Merdol, D. et al. Actin is ADP-ribosylated by the Salmonella enterica virulence-associated protein SpvB. *Molecular Microbiology* **39**, 606-619 (2001).
72. Lesnick, M.L., Reiner, N.E., Fierer, J. & Guiney, D.G. The Salmonella spvB virulence gene encodes an enzyme that ADP-ribosylates actin and destabilizes the cytoskeleton of eukaryotic cells. *Molecular Microbiology* **39**, 1464-1470 (2001).
73. Miao, E.A. et al. Salmonella effectors translocated across the vacuolar membrane interact with the actin cytoskeleton. *Molecular Microbiology* **48**, 401-415 (2003).
74. Browne, S.H., Hasegawa, P., Okamoto, S., Fierer, J. & Guiney, D.G. Identification of Salmonella SPI-2 secretion system components required for SpvB-mediated cytotoxicity in macrophages and virulence in mice. *FEMS Immunology & Medical Microbiology* **52**, 194-201 (2008).
75. Haneda, T. et al. Salmonella type III effector SpvC, a phosphothreonine lyase, contributes to reduction in inflammatory response during intestinal phase of infection. *Cellular Microbiology* **14**, 485-499 (2012).
76. Mazurkiewicz, P. et al. SpvC is a Salmonella effector with phosphothreonine lyase activity on host mitogen-activated protein kinases. *Molecular Microbiology* **67**, 1371-1383 (2008).
77. Habyarimana, F., Sabag-Daigle, A. & Ahmer, B.M.M. The SdiA-Regulated Gene srgE Encodes a Type III Secreted Effector. *Journal of Bacteriology* **196**, 2301-2312 (2014).
78. Guy, R.L., Gonias, L.A. & Stein, M.A. Aggregation of host endosomes by Salmonella requires SPI2 translocation of SseFG and involves SpvR and the *fms-aroE* intragenic region. *Molecular Microbiology* **37**, 1417-1435 (2000).
79. Kuhle, V. & Hensel, M. SseF and SseG are translocated effectors of the type III secretion system of *Salmonella* pathogenicity island 2 that modulate aggregation of endosomal compartments. *Cellular Microbiology* **4**, 813-824 (2002).
80. Deiwick, J. et al. The Translocated Salmonella Effector Proteins SseF and SseG Interact and Are Required To Establish an Intracellular Replication Niche. *Infection and Immunity* **74**, 6965-6972 (2006).
81. McLaughlin, L.M. et al. The *Salmonella* SPI2 Effector Ssel Mediates Long-Term Systemic Infection by Modulating Host Cell Migration. *PLoS Pathog* **5**, e1000671 (2009).

82. Worley, M.J., Nieman, G.S., Geddes, K. & Heffron, F. Salmonella typhimurium disseminates within its host by manipulating the motility of infected cells. *Proceedings of the National Academy of Sciences* **103**, 17915-17920 (2006).
83. Christen, M. et al. Activation of a Bacterial Virulence Protein by the GTPase RhoA. *Science Signaling* **2**, ra71 (2009).
84. Birmingham, C.L., Jiang, X., Ohlson, M.B., Miller, S.I. & Brumell, J.H. *Salmonella*-Induced Filament Formation Is a Dynamic Phenotype Induced by Rapidly Replicating *Salmonella enterica* Serovar Typhimurium in Epithelial Cells. *Infection and Immunity* **73**, 1204-1208 (2005).
85. Ohlson, M.B., Fluhr, K., Birmingham, C.L., Brumell, J.H. & Miller, S.I. SseJ Deacylase Activity by *Salmonella enterica* Serovar Typhimurium Promotes Virulence in Mice. *Infection and Immunity* **73**, 6249-6259 (2005).
86. Lossi, N.S., Rolhion, N., Magee, A.I., Boyle, C. & Holden, D.W. The *Salmonella* SPI-2 effector SseJ exhibits eukaryotic activator-dependent phospholipase A and glycerophospholipid: cholesterol acyltransferase activity. *Microbiology* **154**, 2680 (2008).
87. Kujat Choy, S.L. et al. SseK1 and SseK2 Are Novel Translocated Proteins of *Salmonella enterica* Serovar Typhimurium. *Infection and Immunity* **72**, 5115-5125 (2004).
88. Rytkonen, A. et al. SseL, a *Salmonella* deubiquitinase required for macrophage killing and virulence. *Proceedings of the National Academy of Sciences* **104**, 3502-3507 (2007).
89. Arena, E.T. et al. The Deubiquitinase Activity of the *Salmonella* Pathogenicity Island 2 Effector, SseL, Prevents Accumulation of Cellular Lipid Droplets. *Infection and Immunity* **79**, 4392-4400 (2011).
90. Miao, E.A. et al. *Salmonella typhimurium* leucine-rich repeat proteins are targeted to the SPI1 and SPI2 type III secretion systems. *Molecular Microbiology* **34**, 850-864 (1999).
91. Quezada, C.M., Hicks, S.W., Galán, J.E. & Stebbins, C.E. A family of *Salmonella* virulence factors functions as a distinct class of autoregulated E3 ubiquitin ligases. *Proceedings of the National Academy of Sciences* **106**, 4864-4869 (2009).
92. Levin, I. et al. Identification of an unconventional E3 binding surface on the Ubch5~Ub conjugate recognized by a pathogenic bacterial E3 ligase. *Proceedings of the National Academy of Sciences* **107**, 2848-2853 (2010).
93. Bhavsar, A.P. et al. The *Salmonella* Type III Effector SspH2 Specifically Exploits the NLR Co-chaperone Activity of SGT1 to Subvert Immunity. *PLoS Pathog* **9**, e1003518 (2013).
94. Poh, J. et al. SteC is a *Salmonella* kinase required for SPI-2-dependent F-actin remodelling. *Cellular Microbiology* **10**, 20-30 (2008).
95. Odendall, C. et al. The *Salmonella* Kinase SteC Targets the MAP Kinase MEK to Regulate the Host Actin Cytoskeleton. *Cell Host & Microbe* **12**, 657-668 (2012).
